# Supplementary material
Source: Research Square preprint supplement (doi:10.21203/rs.3.rs-9033802/v1)
Supplement: Supplementary file 1 [file fd5e08f35081e3b650abc934.docx]

**Adjuvanted *Leishmania infantum* extracellular vesicles induce protective immunity in experimental visceral leishmaniasis**

Antonia Efstathiou1,#, Maria Agallou1,#, Dimitra K. Toubanaki1, Fotis Badounas2, Martina Samiotaki3, Ioanna Tremi4, Sophia Havaki4, Vassilis G. Gorgoulis4,5,6,7,8, Evdokia Karagouni1*

1Immunology of Infection Laboratory, Department of Microbiology, Hellenic Pasteur Institute, 127 Vas. Sofias Ave., 11521 Athens, Greece

2Molecular Genetics Laboratory, Department of Immunology, Transgenic Technology Laboratory, Hellenic Pasteur Institute, 11521 Athens, Greece

3Institute of Bioinnovation, Biomedical Sciences Research Center “Alexander Fleming”, 16672 Vari, Greece

4Molecular Carcinogenesis Group, Department of Histology and Embryology, Medical School, National and Kapodistrian University of Athens, 11527 Athens, Greece

5Biomedical Research Foundation of the Academy of Athens, 11527 Athens, Greece

6Division of Cancer Research, Ninewells Hospital and Medical School, University of Dundee, DD19SY Dundee, UK.

7Intelligencia Inc, New York, NY 10014, USA.

8Faculty Institute for Cancer Sciences, Manchester Academic Health Sciences Centre, University of Manchester, Manchester M20 4GJ, UK.

#Antonia Efstathiou and Maria Agallou have contributed equally to this study.

***Correspondence:** ekaragouni@pasteur.gr

**Supplementary Figures**





**Supplementary Fig. 1 | Changes in body weight of PBS-, Addavax-, ExoVac-, and ExoAddaVac-immunized mice.**

Mice were intramuscularly immunized twice a two-weeks interval with 15 µg EVs (ExoVac) or 15 µg EVs adjuvanted with Addavax (ExoAddaVac). Mice injected with equal volumes of PBS or Addavax served as control groups. Body weight was monitored every two days. Black arrows indicate the time points of the first and second immunizations. Data are representative of one independent experiment with n = 4–7 mice per group. Points represent mean values ± SEM.





**Supplementary Fig. 2 | Changes in body weight of immunized mice following challenge with *Leishmania infantum* promastigotes.**

Mice were intramuscularly immunized twice at a two-week interval with 15 µg EVs (ExoVac) or 15 µg EVs adjuvanted with Addavax (ExoAddaVac). Mice injected with equal volumes of PBS or Addavax served as control groups. Two weeks after the booster immunization, mice were intravenously challenged with stationary-phase L. infantum promastigotes, and body weight was monitored every two weeks up to 12 weeks post challenge (92 days). Data are representative of one independent experiment with n = 4–7 mice per group. Points represent mean values ± SEM.


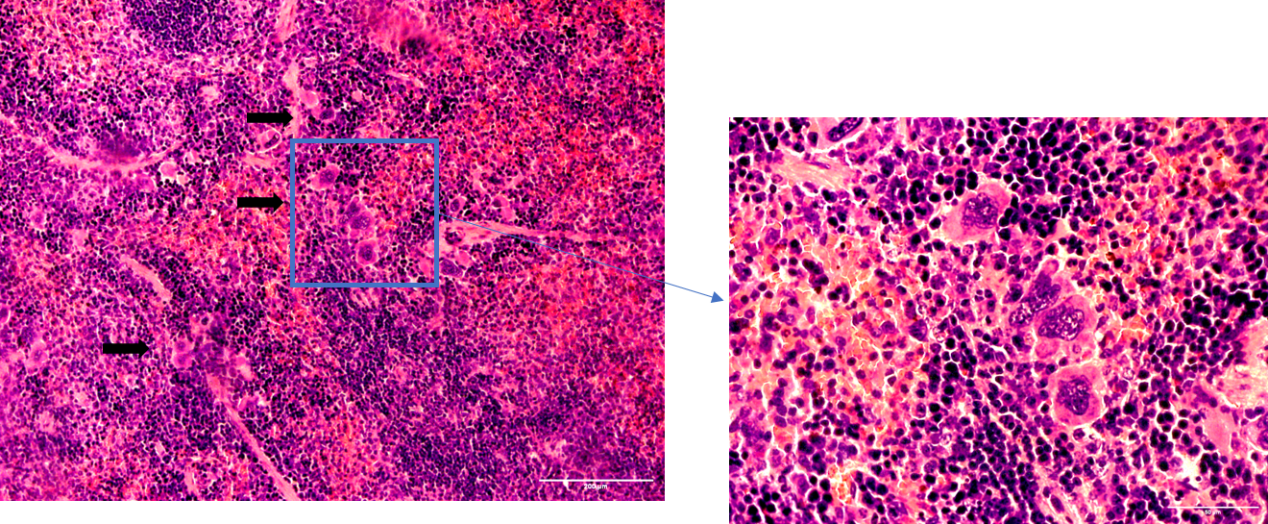


**Supplementary Fig. 3 | Detection of multinucleated giant cells (MGCs) in infected control mice.**

Representative image showing the presence of multinucleated giant cells (MGCs), a hallmark of *Leishmania* infection and inflammation, in the spleen of the non-immunized, infected (PBS) mice at 12 weeks post challenge. Black arrows indicate MGCs. The spleen section (magnification: 20×; scale bar: 200 µm) is shown together with higher-magnification view (60×; scale bar: 50 µm) of the region indicated by the red arrow.





**Supplementary Fig. 4 | Detection of parasite-specific IgG isotypes during *L. infantum* infection.**

(A and B) Mice were intramuscularly immunized twice at a two-week interval with 15 µg EVs (ExoVac) or 15 µg EVs adjuvanted with Addavax (ExoAddaVac). Mice injected with equal volumes of PBS or Addavax served as control groups. Two weeks after the booster immunization, mice were intravenously challenged with L. infantum promastigotes, and immune responses were evaluated during the acute (4 weeks post challenge) and chronic (12 weeks post challenge) phases of infection. Parasite-specific IgG1 (A) and IgG2a (B) antibodies were measured by ELISA. Data are representative from one independent experiment with n=5 mice per group. Data are representative of one independent experiment with n = 5 mice per group. Each symbol represents an individual animal; bars indicate mean values ± SEM. *p < 0.05, **p < 0.01 by two-way ANOVA with Tukey’s multiple-comparison test.


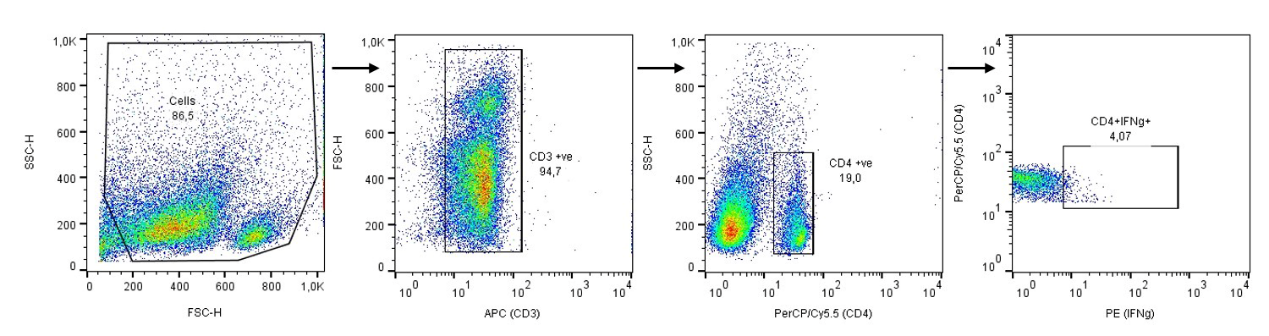


**Supplementary Fig. 5 | Identification and analysis of EVs-specific CD4+ T cells by flow cytometry, related to Methods.**

Flow cytometry gating strategy used for the identification of cytokine-producing CD4⁺ T cells following stimulation with EVs or SLA.
